# Supplementary material for: Comprehensive Analysis of the Prognostic Value and Molecular Function of CRNDE in Glioma at Bulk and Single-Cell Levels
Source: MDPI journal article supplement (doi:10.3390/cells11223669), 2022-11-18

### Supplementary Materials

**Table S1.** The sequences of ASO and primers.

| Name                      | Sequence                     |
|---------------------------|------------------------------|
| ASO-CRNDE-1               | 5'-GAAATTCATCCCAAGGCTGG-3'   |
| ASO-CRNDE-2               | 5'-GGGTTCTCCTCAAATGTTGGC-3'  |
| CRNDE forward             | 5'-ATTGATGCTGTCAGCTAAGTTC-3' |
| CRNDE reverse             | 5'-GACCAGCCTTGGGATGAATTTC-3' |
| GAPDH forward             | 5'-ACCCACTCCTCCACCTTTGAC-3'  |
| GAPDH reverse             | 5'-TGTTGCTGTAGCCAAATTCGTT-3' |
| ACTB forward              | 5'-CATGTACGTTGCTATCCAGGC-3'  |
| ACTB reverse              | 5'-CTCCTTAATGTCACGCACGAT-3'  |
| $\alpha$ -tubulin forward | 5'-GAGTGCATCTCCATCCACGTT-3'  |
| $\alpha$ -tubulin reverse | 5'-TAGAGCTCCCAGCAGGCATT-3'   |

**Figure S1.** The ROC curve based on the expression of CRNDE to predict the 5-year OS of LGG patients in TCGA. The optimum cutoff value of CRNDE was 0.2757 with a specificity of 0.7341 and a sensitivity of 0.7179.

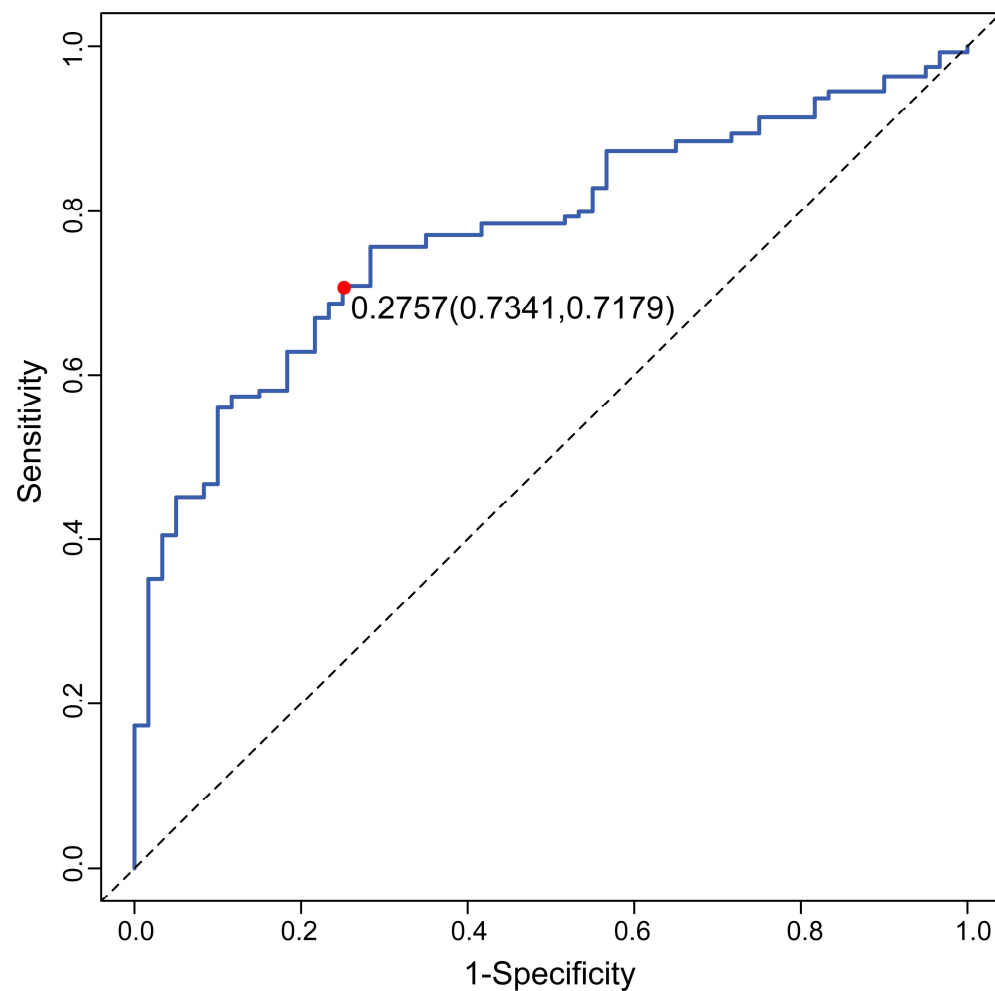

**Figure S2.** Association of clinical and molecular factors with OS based on univariate and multivariate Cox analyses of all glioma patients in TCGA, CGGA, and the whole dataset.

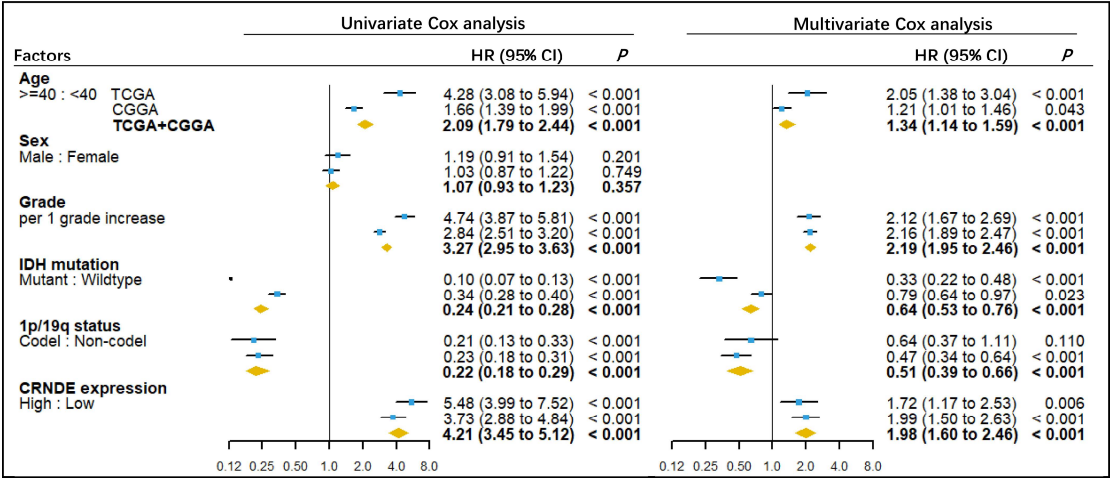

**Figure S3.** The expression features of marker genes of the four major clusters. tSNE plot of the 5311 cells with each cell color-coded by the expression level of marker genes of glioma cell (A), myeloid cell (B), oligodendrocyte (C), and T cell (D).

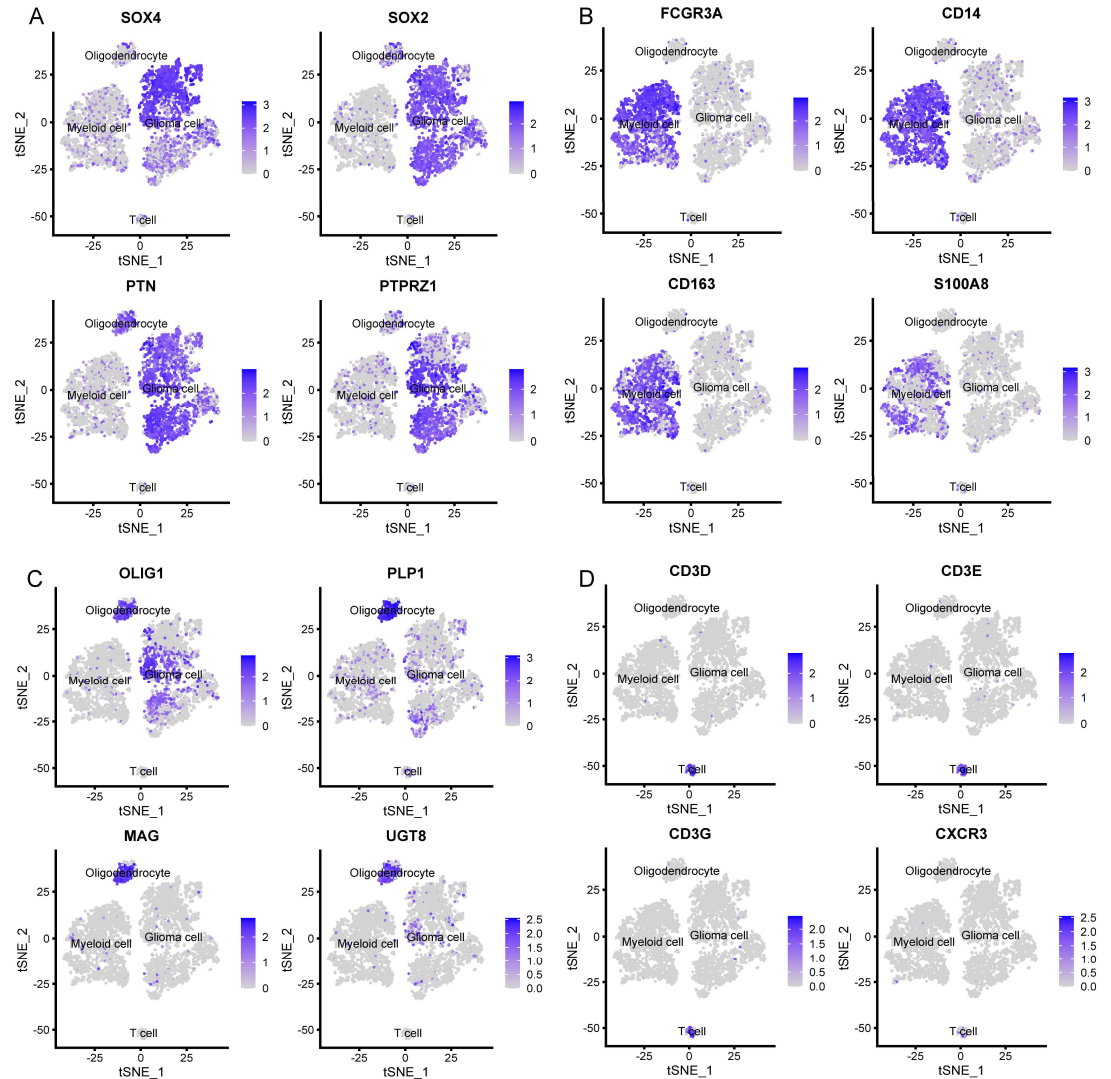

**Figure S4.** Knockdown efficiency of CRNDE in U118 and SW1783 verified by RT-qPCR. ACTB (A),  $\alpha$ -tubulin (B), and GAPDH (C) were used as endogenous controls. (\*\*P < 0.01)

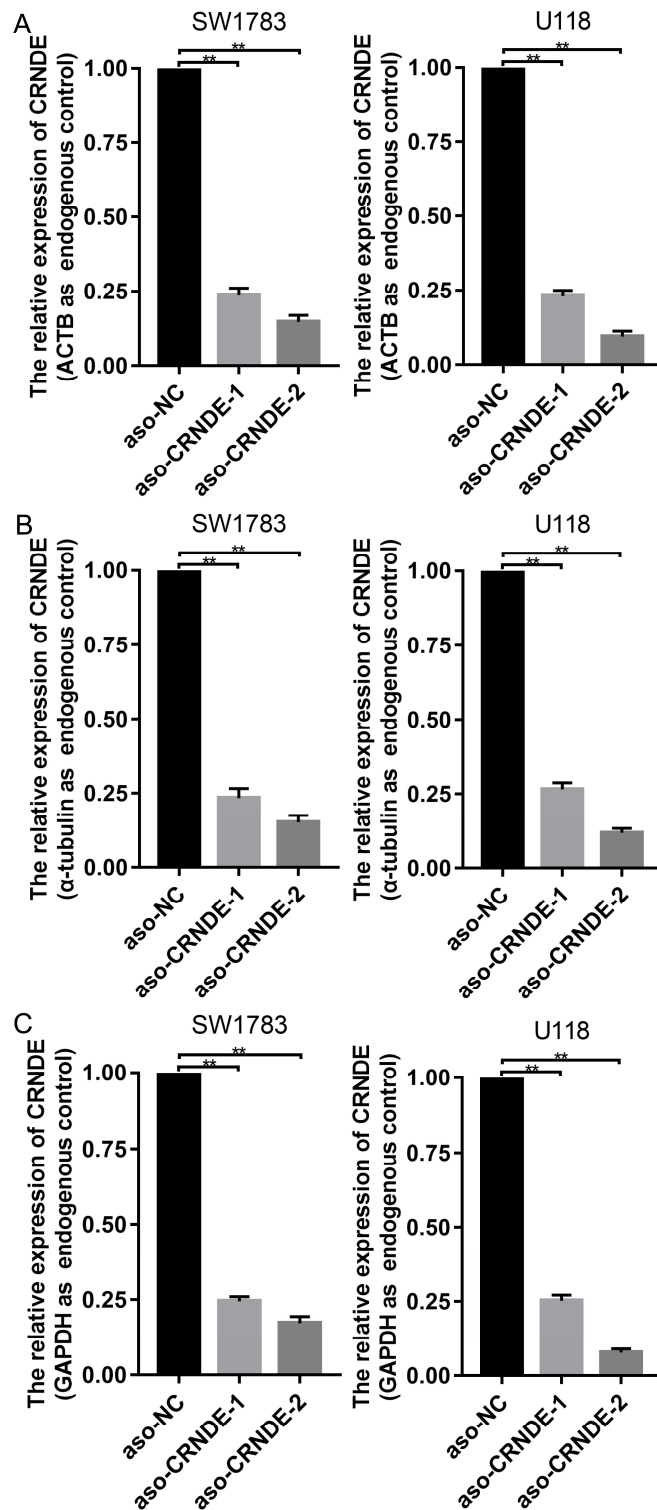

Supplement: s1 [file s1]
